# Supplementary material for: High performance benzene vapor sensor based on three-dimensional photonic crystals of zeolitic imidazolate framework-8@graphene quantum dots
Source: Royal Society of Chemistry journal article supplement (doi:10.1039/d1an01502h), 2021-01-01
Supplement: d1an01502h1.pdf [file d1an01502h1.pdf]

## Electronic Supplementary Material (ESI)

### High Performance Benzene Vapor Sensor Based on Three-Dimensional Photonic Crystals of Zeolitic Imidazolate Framework-8@Graphene Quantum Dots

Zhaolong Wang, Kuo Zhan, Yabin Zhu, Jun Yan, Bin Liu and Yunlin Chen \*

Institute of Applied Micro-Nano Materials, School of Science, Beijing Jiaotong University, Beijing 100044, China

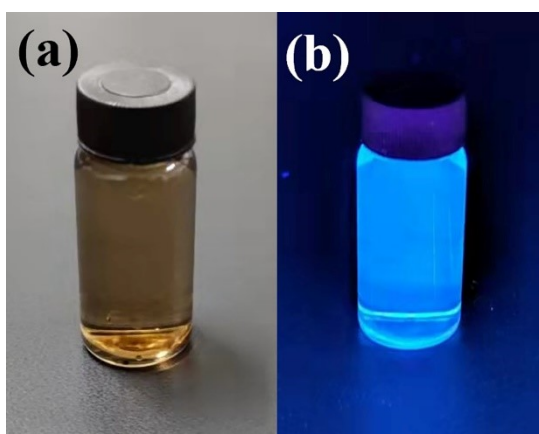

Figure S1 (a) The picture of GQDs in water, and (b) the fluorescence image of GQDs in water under ultraviolet light.

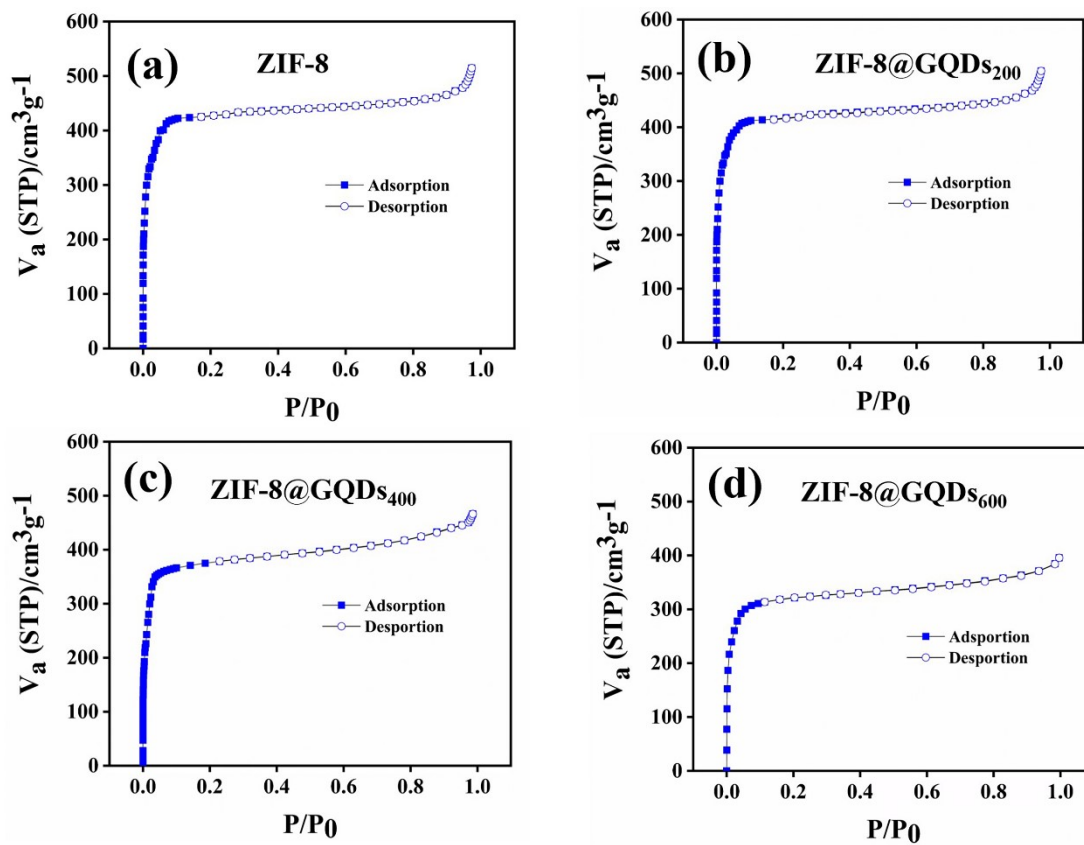

Figure S2 The  $N_2$  adsorption and desorption isotherms of ZIF-8 (a), ZIF-8@GQDs<sub>200</sub> (b), ZIF-8@GQDs<sub>400</sub> (c), ZIF-8@GQDs<sub>600</sub> (d).
